# Supplementary material for: Fibulin-3 is necessary to prevent cardiac rupture following myocardial infarction
Source: Research Square preprint supplement (doi:10.21203/rs.3.rs-3055737/v1), 2023-06-26
Supplement: Supplementary file 1 [file c1b986816f452a892d67ad24.docx]

**SUPPLEMENTARY INFORMATION**

**Fibulin-3 is necessary to prevent cardiac rupture following myocardial infarction**

Lucy A. Murtha, PhD 1,2, Sean A. Hardy, PhD 1,2, Nishani S. Mabotuwana, B Biomed Sci 1,2, Mark J. Bigland, PhD 1,2, Taleah Bailey, B Biomed Sci 1,2, Kalyan Raguram, MBBS 1,2, Saifei Liu, MD, PhD 3, Doan T. Ngo, PhD 1,2,3, Aaron L. Sverdlov, MBBS, PhD 1,2,3,4, Tamara Tomin, PhD 5,6,Ruth Birner-Gruenberger, PhD 5,6,Robert D. Hume, PhD 7, Siiri E. Iismaa, PhD 8,9, David T. Humphreys, PhD 8,9, Ralph Patrick, PhD 8,9, James J.H. Chong, MBBS, PhD 7,10,11, Randall J. Lee, MD, PhD 12,13,14, Richard P. Harvey, PhD 8,9,15, Robert M. Graham, MBBS, MD 8,9, Peter P. Rainer, MD, PhD 16, Andrew J. Boyle*, MBBS, PhD 1,2,4

1. Faculty of Health and Medicine, The University of Newcastle, Newcastle, NSW, Australia
2. Hunter Medical Research Institute, Newcastle, NSW, Australia
3. Department of Cardiology and Clinical Pharmacology, Basil Hetzel Institute, The University of Adelaide, The Queen Elizabeth Hospital, Adelaide, SA, Australia
4. Department of Cardiovascular Medicine, John Hunter Hospital, Newcastle, NSW, Australia
5. Institute of Chemical Technologies and Analytics, Faculty of Technical Chemistry, Technische Universität Wien, Vienna, Austria
6. Diagnostic and Research Institute of Pathology, Medical University of Graz, Graz, Austria
7. Centre for Heart Research, Westmead Institute for Medical Research, The University of Sydney, Sydney, NSW, Australia
8. Victor Chang Cardiac Research Institute, Sydney, NSW, Australia
9. St Vincent’s Clinical School, UNSW, Sydney, Kensington, NSW, Australia
10. Department of Cardiology, Westmead Hospital, Sydney, NSW, Australia
11. Faculty of Medicine and Health, The University of Sydney, Sydney, NSW, Australia
12. Department of Medicine, Division of Cardiology, University of California San Francisco, San Francisco, CA, USA
13. Edyth and Eli Broad Center for Regenerative Medicine and Stem Cell Research, University of California San Francisco, San Francisco, CA, USA
14. Cardiovascular Research Institute, University of California San Francisco, San Francisco, CA, USA
15. School of Biotechnology and Molecular Bioscience, UNSW, Sydney, Kensington, NSW, Australia
16. Division of Cardiology, Medical University of Graz, Graz, Austria and BioTechMed Graz, Graz, Austria

**Short Title:** Fibulin-3, crucial to prevent cardiac rupture post-infarct

**Address for correspondence:**

Andrew J. Boyle, MBBS, PhD

Hunter Medical Research Institute, Kookaburra Circuit, Newcastle, NSW 2305, Australia

Email: [Andrew.boyle@newcastle.edu.au](mailto:Andrew.boyle@newcastle.edu.au) Phone: +61249214205

**Supplementary Methods**

1. ***Analysis of online single cell/nuclei and bulk RNA-Seq datasets***

Online single-cell (sc)RNA-Seq and single-nuclei (sn)RNA-Seq datasets are available from ArrayExpress (www.ebi.ac.uk/arrayexpress) under accession codes E-MTAB-7376 (scRNA-Seq of interstitial and *Pdgfra*-GFP+ cardiac cells from sham and MI hearts [1]) and E-MTAB-7869 (snRNA-Seq of young and aged healthy mouse hearts [2]). Bulk RNA-Seq datasets are available from the gene expression omnibus (www.ncbi.nlm.nih.gov/geo) under identifiers GSE141929 (*Pdgfra*-GFP+ cardiac cells from uninjured and MI hearts [3]) and GSE114695 (total cardiac cells from the left ventricles of sham and MI hearts [4]).

scRNA-Seq and snRNA-Seq datasets were analysed using the *Seurat* version 3.1.4 R package [5]. The scRNA-Seq datasets were processed to log-normalized counts, scaled and principal component (PC) analysis performed on the top 2000 variable genes. For snRNA-Seq, the replicates were batch aligned, similar to previously [2], using the *FindIntegrationAnchors* and *IntegrateData* functions in Seurat and scaled prior to PC analysis. For all datasets, UMAP dimensionality reduction was run on the top 25 PCs. Cell labels were assigned to *Pdgfra*-GFP+ cells using previous characterisations [1]. For the corresponding interstitial cell dataset, the *FindNeighbors* function in *Seurat* was run on the top 25 PCs, followed by *FindClusters* with the *res* parameter set to 0.2. Gene co-expression analysis with *Efemp1* was performed by calculating Pearson correlation coefficients between *Efemp1* and all other genes on log-normalized counts in the *Pdgfra*-GFP+ dataset and selecting the top 20 most positively and negatively correlated genes.

For the GSE141929 bulk RNA-seq, previous gene counts were available and downloaded for analysis. For GSE114695, raw Fastq files were downloaded, mapped and processed to gene counts using STAR aligner [6] following removal of Illumina adaptors and trimming of low-quality bases using Trimmomatic [7]. Analysis of bulk RNA-Seq data was performed using DESeq2 [8]. Differentially expressed (DE) genes were evaluated between MI time-points and undamaged hearts for the Pdgfra-GFP+ RNA-Seq, and between MI and sham hearts for matched time-points in the total cardiac cell RNA-Seq. *Efemp1* was considered DE if it obtained an adjusted p-value below 0.05.

1. ***LC-MS/MS analysis***

Failing and non-failing heart tissue specimens were lysed in 200 µl of 100 mM Tris pH = 8.5, containing 1 % sodium dodecylsulfate and 10 mM of NEM, and 100 µg of protein was acetone-precipitated overnight. Protein pellets were re-dissolved in 87.5 µl of 50 % trifluoroethanol in 50 mM ammonium-bicarbonate, reduced with tris(2-carboxyethyl)phosphine (5 mM final concentration), then re-alkylated and digested with trypsin overnight at 37°C. The tryptic digest (40 µg) was then fractionated using Pierce High pH Reversed-Phase Peptide Fractionation Kit (Thermo Fisher, USA) according to manufacturer’s instructions and subjected to LC-MS/MS analysis. Chromatography was carried out on an Ultimate 3000 RCS Nano Dionex system equipped with an Ionoptiks Aurora Series UHPLC C18 column (250 mm x 75 µm, 1.6 µm) (Bruker Daltonics, Germany). Mass spectrometry was performed on a Maxis II qTOF set to fragment the top 20 most abundant peptides.

1. ***RNA isolation and analysis of day 3 post-MI tissue***

Quantitative polymerase Reaction (qPCR) was performed to determine the expression levels of a subset of genes belonging to four genes associate with scar formation (Collagen-I alpha-1, Collagen-III alpha-1, Mmp2 & Mmp9). RNA isolation was conducted using TRIzol® Plus RNA purification reagents (Life Technologies) as per the manufacturer protocol. RNA samples were subject to DNase I treatment using a DNase I, Amplification Grade Kit (ThermoFisher scientific) as per the manufacturer protocol. Total RNA was quantified using the NanoDrop 1000 then DNAse 1 treated (Invitrogen). One µg of RNA was used for the synthesis of cDNA using Oligo (dT)18 primers (Bioline), dNTP (Bioline) and a SuperScript® III (Invitrogen) First Strand Synthesis System for RT-PCR.

Assays were validated by generating standard curves to evaluate the efficiency of each primer set. The specificity of PCR products was analysed via melt curve and gel electrophoresis. All target and reference genes from cDNA transcripts were measured using quantitative real-time polymerase chain reaction (qPCR), using the 7500 SDS software v2.0.6 (Applied Biosystems, Australia), and were performed on the ABI 7500. The geomean of housekeeping genes Hprt and TPt1 mRNA abundance was used as the reference, and final values calculated using the ΔΔCt method. The following primers were used:

| **target** | **NCBI Gene Sequence Reference** | **FW primer** | **REV primer** |
| --- | --- | --- | --- |
| Tpt1 | NM_009429.3 | ATGACGAGCTGTTCTCCGAC | AACACCGGTGACTACTGTGC |
| Hprt | NM_013556.2 | ACAGGCCAGACTTTGTTGGA | ACTTGCGCTCATCTTAGGCT |
| Col3a1 | NM_009930.2 | GCGGCTGAGTTTTATGACGG | GGTGGCTGCATCCCAATTCA |
| Col1a1 | NM_007742.4 | CTGACGCATGGCCAAGAAGA | TACCTCGGGTTTCCACGTCT |
| Mmp9 | NM_013599.5 | CCAGAGGTAACCCACGTCAG | TGGAAACTCACACGCCAGAA |
| Mmp2 | NM_008610.3 | GATAACCTGGATGCCGTCGT | TGGTGTGCAGCGATGAAGAT |

1. ***Second harmonic generation two-photon imaging***

Imaging was carried out on a Leica TCS SP8 MP microscope using 800 nm excitation laser wavelength. Collagen fibre orientation and length was quantified on Fiji Image J [9]. Brightness and exposure threshold settings were applied to all imaged samples, and 40 collagen fibres were traced per image. The proportion of fibres within ±30° of the median angle for each animal was assessed to determine the degree of fibre-alignment. Analysis was performed by two blinded investigators with strong inter-assessor reliability (length: r=0.917, p<0.0001; angle: r=0.963, p<0.0001).

1. ***Gene set enrichment analysis***

GSEA pre-ranked run parameters used the base settings with geneset permutation and 1000 permutations. Prior to analysis, a ranked list was calculated with each gene assigned a score based on the FDR and the direction of the log fold-change (“+” or “−”). Results of the GSEA were then loaded into Cytoscape version 3.7.2 for visualisation and further analysis using the EnrichmentMap plugin. The settings used in Cytoscape were Jaccard Overlap Combined: 0.375 - Test used: Jaccard Overlap Combined Index (k constant = 0.5). A permutation-based P value that was corrected for multiple testing to produce a permutation-based false discovery rate (FDR) Q-value with a cutoff of 0.01 for initial analysis and increased to 0.001 for image visualisation. Nodes were coloured to reflect the different groups in question, and networks of related ontologies were circled and assigned a group label using the AutoAnnotate application. The network map layout algorithm used was prefuse force-directed weighted using the gene set similarity coefficient followed by manual adjustments, separating networks and nodes by direction of fold-change for clarity purposes.

**Supplementary Figures and Tables**

**
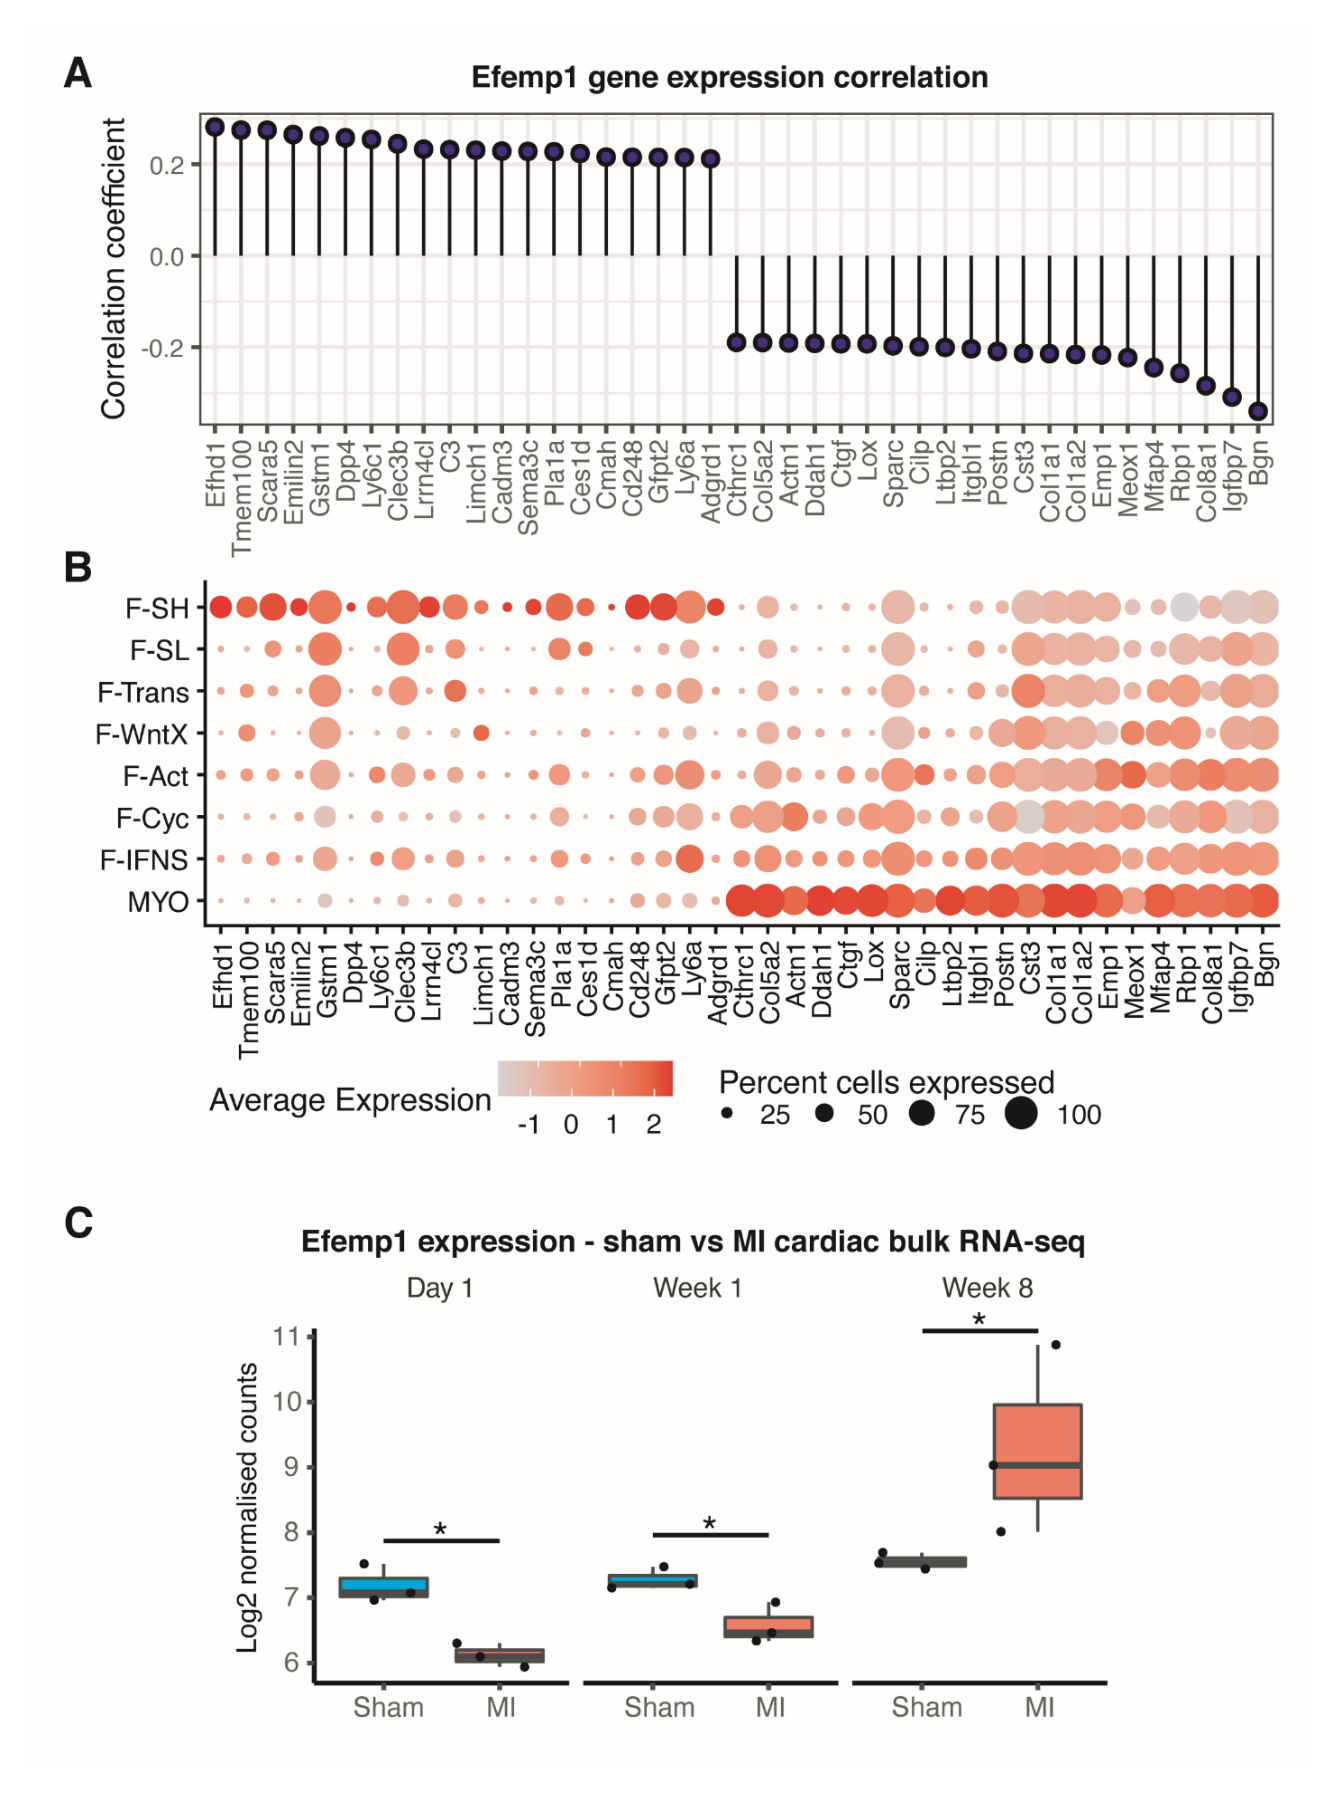
**

**Supplementary Figure 1.** (A) Top positively and negatively correlated genes with *Efemp1* in *Pdgfra*-GFP+ cells [10]. (B) Expression of top positively and negatively correlated genes according to a dot plot where colour indicates level of expression and size of the dot indicates the percentage of cells expressing the gene. (C)Expression of *Efemp1* in a bulk RNA-seq MI time course comparing MI or sham hearts at day 1, week 1 and week 8 post-injury [4]. *indicates whether *Efemp1* is differentially expressed (DESeq2; Padj < 0.05) at an MI time-point relative to its sham control.


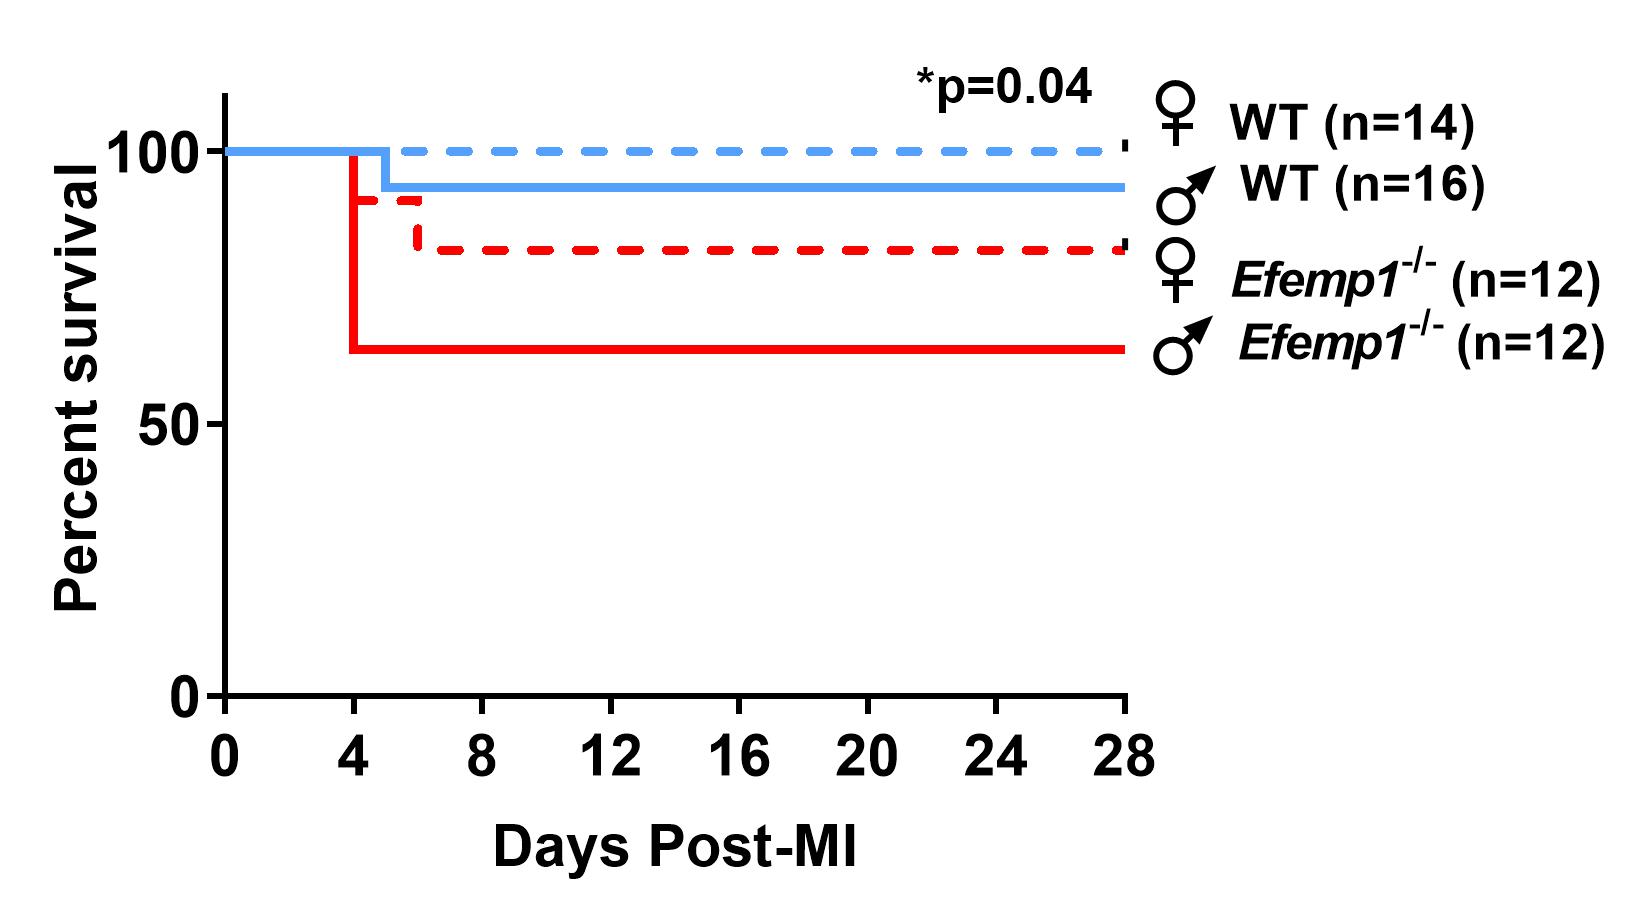


**Supplementary Figure 2. Fibulin-3 deficient male mice had significantly higher rates of cardiac rupture than females.** Higher rates of rupture in male mice has been reported in the literature [11-14], with one paper demonstrating 2-3 fold increased rupture in 3 strains of male mice [11]. Intramural haemorrhage severity, hematoma formation and inflammatory cell accumulation were suggested potential mechanisms. Another study indicated estrogenic as a potential mechanism, demonstrating that estrogenic-treated male mice had reduced cardiac rupture prevalence, which was associated with reduced MMP-9 activity, and AKT pathway apoptosis inhibition [12]. A further study suggested increases in the severity of inflammation, MMP-9 activation and damage to collagen matrix accounted for the male bias in cardiac rupture [13]. The mechanisms governing the gender differences seen in rupture prevalence was outside the scope of this study, however investigation into the inflammatory, MMP, and collagen matrix differences are warranted.

**Supplementary Table 1.** Cell number and proportion metadata of interstitial cell populations. Data is separated by time-point/condition post-MI, from the mouse scRNAseq dataset [15].

| **Rank** | **Cluster** | **Condition** | **Cell #** | **% total cells at time** |
| --- | --- | --- | --- | --- |
| 1 | MYO | Sham | 22 | 0.384413769 |
| 2 | MAC8 | Sham | 13 | 0.227153591 |
| 3 | F-SH | Sham | 657 | 11.47999301 |
| 4 | F-Act | Sham | 553 | 9.662764284 |
| 5 | F-WntX | Sham | 96 | 1.677441901 |
| 6 | M1MΦ | Sham | 3 | 0.052420059 |
| 7 | MAC-IFNIC | Sham | 3 | 0.052420059 |
| 8 | F-SL | Sham | 1348 | 23.55408003 |
| 9 | M2MΦ | Sham | 26 | 0.454307182 |
| 10 | Mural | Sham | 184 | 3.215096977 |
| 11 | M1Mo | Sham | 40 | 0.698934125 |
| 12 | EC3 | Sham | 229 | 4.001397868 |
| 13 | DC | Sham | 24 | 0.419360475 |
| 14 | MAC-TR | Sham | 159 | 2.778263149 |
| 15 | EC2 | Sham | 241 | 4.211078106 |
| 16 | Cyc | Sham | 37 | 0.646514066 |
| 17 | Glial | Sham | 18 | 0.314520356 |
| 18 | EC1 | Sham | 1215 | 21.23012406 |
| 19 | MAC6 | Sham | 33 | 0.576620654 |
| 20 | TC1-Cd8 | Sham | 152 | 2.655949677 |
| 21 | MAC7 | Sham | 44 | 0.768827538 |
| 22 | NKC | Sham | 48 | 0.838720951 |
| 23 | TC2-Cd4 | Sham | 132 | 2.306482614 |
| 24 | BC | Sham | 446 | 7.793115499 |
|  |  |  | **Total # cells present** | **5723** |
|  | | | | |
| **Rank** | **Cluster** | **Condition** | **Cell #** | **% total cells at time** |
| 1 | MAC8 | MI-day 3 | 106 | 2.735483871 |
| 2 | MYO | MI-day 3 | 4 | 0.103225806 |
| 3 | F-SH | MI-day 3 | 25 | 0.64516129 |
| 4 | F-SL | MI-day 3 | 40 | 1.032258065 |
| 5 | M1MΦ | MI-day 3 | 1964 | 50.68387097 |
| 6 | M2MΦ | MI-day 3 | 49 | 1.264516129 |
| 7 | F-WntX | MI-day 3 | 8 | 0.206451613 |
| 8 | MAC-IFNIC | MI-day 3 | 125 | 3.225806452 |
| 9 | F-Act | MI-day 3 | 185 | 4.774193548 |
| 10 | Cyc | MI-day 3 | 71 | 1.832258065 |
| 11 | M1Mo | MI-day 3 | 493 | 12.72258065 |
| 12 | MAC6 | MI-day 3 | 110 | 2.838709677 |
| 13 | Mural | MI-day 3 | 10 | 0.258064516 |
| 14 | EC2 | MI-day 3 | 37 | 0.95483871 |
| 15 | MAC-TR | MI-day 3 | 23 | 0.593548387 |
| 16 | EC3 | MI-day 3 | 75 | 1.935483871 |
| 17 | EC1 | MI-day 3 | 162 | 4.180645161 |
| 18 | MAC7 | MI-day 3 | 43 | 1.109677419 |
| 19 | TC2-Cd4 | MI-day 3 | 16 | 0.412903226 |
| 20 | TC1-Cd8 | MI-day 3 | 28 | 0.722580645 |
| 21 | DC | MI-day 3 | 271 | 6.993548387 |
| 22 | BC | MI-day 3 | 27 | 0.696774194 |
| 23 | NKC | MI-day 3 | 2 | 0.051612903 |
| 24 | Glial | MI-day 3 | 1 | 0.025806452 |
|  |  |  | **Total # cells present** | **3875** |
|  | | | | |
| **Rank** | **Cluster** | **Condition** | **Cell #** | **% total cells at time** |
| 1 | MAC8 | MI-day 7 | 18 | 0.482185909 |
| 2 | F-WntX | MI-day 7 | 15 | 0.401821591 |
| 3 | MYO | MI-day 7 | 429 | 11.49209751 |
| 4 | F-SH | MI-day 7 | 172 | 4.607554246 |
| 5 | F-Act | MI-day 7 | 368 | 9.858023038 |
| 6 | F-SL | MI-day 7 | 265 | 7.098848111 |
| 7 | M1MΦ | MI-day 7 | 134 | 3.589606215 |
| 8 | Mural | MI-day 7 | 39 | 1.044736137 |
| 9 | MAC-IFNIC | MI-day 7 | 27 | 0.723278864 |
| 10 | M2MΦ | MI-day 7 | 600 | 16.07286365 |
| 11 | EC3 | MI-day 7 | 102 | 2.73238682 |
| 12 | Cyc | MI-day 7 | 108 | 2.893115457 |
| 13 | EC2 | MI-day 7 | 95 | 2.544870078 |
| 14 | M1Mo | MI-day 7 | 79 | 2.11626038 |
| 15 | MAC-TR | MI-day 7 | 55 | 1.473345834 |
| 16 | EC1 | MI-day 7 | 503 | 13.47441736 |
| 17 | MAC6 | MI-day 7 | 26 | 0.696490758 |
| 18 | DC | MI-day 7 | 96 | 2.571658184 |
| 19 | NKC | MI-day 7 | 26 | 0.696490758 |
| 20 | TC2-Cd4 | MI-day 7 | 95 | 2.544870078 |
| 21 | TC1-Cd8 | MI-day 7 | 144 | 3.857487276 |
| 22 | BC | MI-day 7 | 278 | 7.44709349 |
| 23 | MAC7 | MI-day 7 | 54 | 1.446557728 |
| 24 | Glial | MI-day 7 | 5 | 0.13394053 |
|  |  |  | **Total # cells present** | **3733** |

**Supplementary Table 2.** *Efemp1* expression level metadataof interstitial cell populations. Data is separated by time-point/condition post-MI, from the mouse scRNAseq dataset [15].

| **Cell type** | **Comparison** | **p-value** | **avg_log2FC** | **FC (fold hange)** | **pct.1** | **pct.2** | **p-value adj.** |
| --- | --- | --- | --- | --- | --- | --- | --- |
| All-cells | MI-day 3 vs sham | 1.16E-20 | -0.292960245 | -1.225151571 | 0.171 | 0.231 | 1.79E-16 |
| F-Act | MI-day 3 vs sham | 5.73E-08 | 0.289387695 | 1.222121477 | 0.128 | 0.053 | 0.000881057 |
| F-SL | MI-day 3 vs sham | 0.057302162 | 0.263363636 | 1.200273877 | 0.198 | 0.142 | 1 |
| F-SH | MI-day 3 vs sham | 0.075556715 | 0.200029932 | 1.148722188 | 0.457 | 0.43 | 1 |
| F-WntX | MI-day 3 vs sham | 0.163198825 | -0.123439616 | -1.089328903 | 0.344 | 0.411 | 1 |
| F-Trans | MI-day 3 vs sham | 0.080210514 | -0.111755944 | -1.080542594 | 0.125 | 0.125 | 1 |
| MYO | MI-day 3 vs sham | 0.116412928 | 0.401389359 | 1.320779248 | 0.167 | 0.014 | 1 |
| F-Cyc | MI-day 3 vs sham | 0.031441644 | -0.426584976 | -1.344048293 | 0.107 | 0.19 | 1 |
| All-cells | MI-day 3 vs sham | 0.02143049 | -0.511474719 | -1.4255066 | 0.061 | 0.19 | 1 |
| F-IFNS | MI-day 3 vs sham | NA | NA | #VALUE! | NA | NA | NA |
|  | | | | | | | |
| **Cell type** | **Comparison** | **p-value** | **avg_log2FC** | **FC (fold hange)** | **pct.1** | **pct.2** | **p-value adj.** |
| All-cells | MI-day 7 vs sham | 1.18E-134 | -0.581584102 | -1.496491518 | 0.077 | 0.231 | 1.82E-130 |
| F-WntX | MI-day 7 vs sham | 5.40E-08 | -0.373791968 | -1.295754108 | 0.138 | 0.411 | 0.000830452 |
| F-IFNS | MI-day 7 vs sham | 3.21E-06 | -0.789749051 | -1.728773725 | 0.038 | 0.26 | 0.049354064 |
| F-SL | MI-day 7 vs sham | 0.01049345 | -0.093937297 | -1.067278951 | 0.105 | 0.142 | 1 |
| F-SH | MI-day 7 vs sham | 0.02247654 | -0.155479678 | -1.113791879 | 0.374 | 0.43 | 1 |
| F-Cyc | MI-day 7 vs sham | 0.02143049 | -0.511474719 | -1.4255066 | 0.061 | 0.19 | 1 |
| All-cells | MI-day 7 vs sham | 0.02143049 | -0.511474719 | -1.4255066 | 0.061 | 0.19 | 1 |
| F-Act | MI-day 7 vs sham | NA | NA | #VALUE! | NA | NA | NA |
| F-Trans | MI-day 7 vs sham | NA | NA | #VALUE! | NA | NA | NA |
| MYO | MI-day 7 vs sham | NA | NA | #VALUE! | NA | NA | NA |

**Supplementary Table 3.** GOnet/DICE GOBP enrichment of genes negatively correlated with *Efemp1* expression presented in Supplementary Fig 1A, from the mouse scRNAseq dataset [15].

| Rank | GO_term_ID | GOBP term | p-value | FDR p-value | # of genes |
| --- | --- | --- | --- | --- | --- |
| 1 | GO:0043062 | extracellular structure organization | 0.00E+00 | 1.75E-07 | 8 |
| 2 | GO:0030198 | extracellular matrix organization | 0.00E+00 | 1.24E-07 | 8 |
| 3 | GO:0097435 | supramolecular fiber organization | 2.00E-09 | 7.18E-06 | 8 |
| 4 | GO:0030199 | collagen fibril organization | 7.75E-08 | 2.11E-04 | 4 |
| 5 | GO:0085029 | extracellular matrix assembly | 4.98E-07 | 1.09E-03 | 3 |
| 6 | GO:0001503 | ossification | 9.36E-07 | 1.70E-03 | 5 |
| 7 | GO:0048513 | animal organ development | 1.67E-06 | 2.60E-03 | 12 |
| 8 | GO:0007155 | cell adhesion | 2.56E-06 | 3.06E-03 | 7 |
| 9 | GO:0001501 | skeletal system development | 2.68E-06 | 3.06E-03 | 6 |
| 10 | GO:0022610 | biological adhesion | 2.80E-06 | 3.06E-03 | 7 |
| 11 | GO:0009653 | anatomical structure morphogenesis | 5.23E-06 | 5.19E-03 | 10 |
| 12 | GO:0048731 | system development | 7.18E-06 | 6.52E-03 | 13 |
| 13 | GO:0048251 | elastic fiber assembly | 2.43E-05 | 2.04E-02 | 2 |
| 14 | GO:0007275 | multicellular organism development | 3.47E-05 | 2.56E-02 | 13 |
| 15 | GO:0043589 | skin morphogenesis | 3.72E-05 | 2.56E-02 | 2 |
| 16 | GO:0061448 | connective tissue development | 3.76E-05 | 2.56E-02 | 4 |
| 17 | GO:0009888 | tissue development | 4.47E-05 | 2.87E-02 | 8 |
| 18 | GO:0110148 | biomineralization | 5.62E-05 | 3.13E-02 | 3 |
| 19 | GO:0031214 | biomineral tissue development | 5.62E-05 | 3.13E-02 | 3 |
| 20 | GO:0016043 | cellular component organization | 5.74E-05 | 3.13E-02 | 13 |
| 21 | GO:0001568 | blood vessel development | 6.43E-05 | 3.34E-02 | 5 |
| 22 | GO:0048856 | anatomical structure development | 7.99E-05 | 3.80E-02 | 13 |
| 23 | GO:0071840 | cellular component organization or biogenesis | 8.54E-05 | 3.80E-02 | 13 |
| 24 | GO:0001944 | vasculature development | 8.71E-05 | 3.80E-02 | 5 |
| 25 | GO:0048646 | anatomical structure formation involved in morphogenesis | 8.72E-05 | 3.80E-02 | 6 |
| 26 | GO:0072358 | cardiovascular system development | 9.78E-05 | 4.10E-02 | 5 |
| 27 | GO:0007160 | cell-matrix adhesion | 1.06E-04 | 4.26E-02 | 3 |
| 28 | GO:0070208 | protein heterotrimerization | 1.15E-04 | 4.48E-02 | 2 |

**Supplementary Table 4.** Echocardiography parameters following experimental myocardial infarction.

|  | **Baseline** | | **Day 2** | | **Day 28** | |
| --- | --- | --- | --- | --- | --- | --- |
|  | **WT** | ***Efemp1-/-*** | **WT** | ***Efemp1-/-*** | **WT** | ***Efemp1-/-*** |
| Weight (g) | 26.2 ± 4.4 | 27.6 ± 5 | 26 ± 4.1 | 27.4 ± 4.9 | 26.9 ± 4.1 | 28.1 ± 6 |
| Heart Rate (BPM) | 448 ± 55 | 470 ± 44 | 578 ± 43 | 556 ± 59 | 521 ± 56 | 533 ± 51 |
| **Cardiac Function** |  |  |  |  |  |  |
| LVEF (%) | 57.5 ± 8 | 55.4 ± 7.9 | 38 ± 15.1 | 33.5 ± 15.5 | 31 ± 12.2 | 23.3 ± 12.7 |
| SV (µL) | 29.7 ± 5.8 | 29.3 ± 7.5 | 21.8 ± 7.3 | 21.7 ± 9.4 | 26.9 ± 10 | 29.8 ± 16.3 |
| FS (%) | 19.8 ± 5 | 19.6 ± 4.5 | 13 ± 5.8 | 11.8 ± 4.9 | 8.3 ± 3.1 | 10.2 ± 6.1 |
| CO (mL/min) | 13.4 ± 3.5 | 13.7 ± 3.5 | 12.5 ± 3.9 | 12.1 ± 5.2 | 14 ± 5.6 | 15.6 ± 8.5 |
| FAC (%) | 50.8 ± 10.5 | 47.8 ± 10.6 | 36.2 ± 17.2 | 32.2 ± 15.3 | 32 ± 13.8 | 22.2 ± 13.7 |
| **Cardiac Structure** |  |  |  |  |  |  |
| EDV (µL) | 52.3 ± 10.2 | 53.2 ± 12.1 | 60.6 ± 14.8 | 68.7 ± 18 | 97.9 ± 52.4 | 142.6 ± 71.4 |
| ESV (µL) | 22.6 ± 7 | 23.9 ± 7.2 | 38.8 ± 16.1 | 46.9 ± 19 | 71 ± 46 | 112.8 ± 68.2 |
| LVID;d (mm) | 3.9 ± 0.4 | 3.9 ± 0.4 | 4.1 ± 0.5 | 4.3 ± 0.5 | 4.7 ± 1 | 5.6 ± 1.1 |
| LVID;s (mm) | 2.8 ± 0.5 | 2.8 ± 0.5 | 3.3 ± 0.8 | 3.7 ± 0.7 | 4 ± 1.2 | 5.1 ± 1.4 |
| IVS;d (mm) | 0.8 ± 0.1 | 0.9 ± 0.1 | 0.8 ± 0.3 | 0.7 ± 0.2 | 0.7 ± 0.2 | 0.5 ± 0.2 |
| IVS;s (mm) | 1.2 ± 0.3 | 1.1 ± 0.3 | 1 ± 0.4 | 0.9 ± 0.3 | 0.9 ± 0.4 | 0.6 ± 0.3 |
| LVPW;d (mm) | 0.8 ± 0.1 | 0.8 ± 0.1 | 0.8 ± 0.2 | 0.7 ± 0.2 | 0.8 ± 0.2 | 0.6 ± 0.3 |
| LVPW;s (mm) | 1.1 ± 0.2 | 1.1 ± 0.2 | 1 ± 0.3 | 0.9 ± 0.3 | 1 ± 0.3 | 0.7 ± 0.4 |
| LV Mass (mg) | 90.1 ± 16.9 | 93.3 ± 24.3 | 96.1 ± 27.7 | 95.3 ± 29.6 | 113.2 ± 45.1 | 94.7 ± 30.9 |

LV ejection fraction (LVEF) and end-diastolic volume was assessed in the parasternal 2D long-axis view. LV internal diameter and ventricular wall thickness (intraventricular septal wall; LV posterior wall) were obtained at the mid-papillary short-axis view. SV, stroke volume; FS, fractional shortening; CO, cardiac output; FAC, fractional area change; EDV, end diastolic volume; ESV, end systolic volume; LVID, left ventricular internal diameter; IVS, intraventricular septum; LVPW, left ventricular posterior wall; d, diastolic; s, systolic; LV, left ventricle. Mean ± SD

**Supplementary Table 5.** Full list of differentially expressed genes from bulk RNA-seq of infarct zone tissue of *Efemp1-/-* and WT mice at day-3 post-MI, ranked by fold change of expression in *Efemp1-/-* mice relative to WT.

| **Gene #** | **Gene** | **Chr** | **P-value** | **FDR** | **Fold change** |
| --- | --- | --- | --- | --- | --- |
| 1 | Hist1h1a | 13 | 4.09E-05 | 0.023708 | 12.79891137 |
| 2 | Hist1h2bb | 13 | 8.1E-06 | 0.008095 | 11.63779796 |
| 3 | Hist1h1b | 13 | 9.99E-05 | 0.037073 | 10.58158179 |
| 4 | Hist1h2b | 13 | 9.74E-05 | 0.036688 | 9.852124096 |
| 5 | Hist1h4d | 13 | 0.000125 | 0.04011 | 6.642597966 |
| 6 | Fosb | 7 | 1.73E-05 | 0.013336 | 5.558015277 |
| 7 | Cd163l1 | 7 | 4.9E-05 | 0.024229 | 3.113529611 |
| 8 | Niacr1 | 5 | 4.48E-05 | 0.023708 | 3.112720416 |
| 9 | Il1r2 | 1 | 6.99E-05 | 0.032411 | 2.568681649 |
| 10 | Gsta3 | 1 | 4.14E-05 | 0.023708 | 2.032256637 |
| 11 | Mmp9 | 2 | 0.000174 | 0.046484 | 1.66138093 |
| 12 | Nupr1 | 7 | 0.000191 | 0.048063 | 1.641822769 |
| 13 | Ccl3 | 11 | 0.000162 | 0.045792 | 1.607002251 |
| 14 | Osgin1 | 8 | 0.000117 | 0.038906 | 1.591658202 |
| 15 | Has2 | 15 | 0.000182 | 0.046799 | 1.579222938 |
| 16 | Rdh10 | 1 | 0.000173 | 0.046484 | 1.44114576 |
| 17 | Gpr146 | 5 | 0.000144 | 0.043809 | -1.29699864 |
| 18 | Mtus1 | 8 | 8.97E-05 | 0.03518 | -1.32776045 |
| 19 | Smarcd3 | 5 | 0.000146 | 0.043809 | -1.37198973 |
| 20 | Trdn | 10 | 0.00015 | 0.043809 | -1.37372557 |
| 21 | Slc4a3 | 1 | 8.18E-05 | 0.03373 | -1.40470187 |
| 22 | Fam174b | 7 | 4.56E-05 | 0.023708 | -1.41929322 |
| 23 | Myzap | 9 | 0.000151 | 0.043809 | -1.44083237 |
| 24 | Cav3 | 6 | 3.4E-05 | 0.022668 | -1.48632015 |
| 25 | Ppif | 14 | 0.000148 | 0.043809 | -1.49431931 |
| 26 | mt-Nd5 | M | 9.87E-06 | 0.009493 | -1.50034876 |
| 27 | Gmpr | 13 | 4.69E-06 | 0.005538 | -1.50277571 |
| 28 | Lpl | 8 | 0.000116 | 0.038906 | -1.50944899 |
| 29 | Ldhb | 6 | 1.75E-05 | 0.013336 | -1.51587033 |
| 30 | Art3 | 5 | 4.94E-05 | 0.024229 | -1.51723736 |
| 31 | Acsl1 | 8 | 0.000115 | 0.038906 | -1.52112494 |
| 32 | Myl3 | 9 | 0.000172 | 0.046484 | -1.54089793 |
| 33 | Apobec2 | 17 | 7.34E-05 | 0.032867 | -1.54199544 |
| 34 | Tcap | 11 | 1.41E-05 | 0.011613 | -1.55541652 |
| 35 | Perp | 10 | 4.07E-05 | 0.023708 | -1.56865077 |
| 36 | Eno3 | 11 | 0.00012 | 0.039107 | -1.56872324 |
| 37 | Sspn | 6 | 8.59E-05 | 0.034856 | -1.57093327 |
| 38 | Tnnc1 | 14 | 0.000104 | 0.037511 | -1.57425575 |
| 39 | Dgat2 | 7 | 0.000104 | 0.037511 | -1.59285451 |
| 40 | Tnni3 | 7 | 1.12E-05 | 0.010033 | -1.60608144 |
| 41 | Fabp3 | 4 | 3.23E-06 | 0.003997 | -1.64030512 |
| 42 | Efcab2 | 1 | 3.73E-05 | 0.023079 | -1.65422805 |
| 43 | Acss1 | 2 | 4.42E-07 | 0.001045 | -1.66990303 |
| 44 | Itgb1bp2 | X | 7.64E-05 | 0.033626 | -1.67956939 |
| 45 | Me3 | 7 | 0.000115 | 0.038906 | -1.68421925 |
| 46 | Prox1 | 1 | 1.07E-06 | 0.001854 | -1.70002823 |
| 47 | Chrm2 | 6 | 0.000186 | 0.047375 | -1.7034078 |
| 48 | Mov10l1 | 15 | 8.03E-05 | 0.033648 | -1.71009343 |
| 49 | Atp2a2 | 5 | 0.000139 | 0.043386 | -1.72516799 |
| 50 | Hfe2 | 3 | 0.000118 | 0.038906 | -1.78057117 |
| 51 | Asb11 | X | 8E-05 | 0.033648 | -1.7942595 |
| 52 | Gm14290 | 2 | 4.53E-05 | 0.023708 | -1.79475912 |
| 53 | Pde1c | 6 | 0.000161 | 0.045792 | -1.79584375 |
| 54 | Cd300lg | 11 | 9.07E-05 | 0.03518 | -1.80510862 |
| 55 | Gja5 | 3 | 8.83E-05 | 0.03518 | -1.80662587 |
| 56 | Pgam | 11 | 3.44E-08 | 0.000201 | -1.80845317 |
| 57 | Ckmt2 | 13 | 2.41E-06 | 0.003483 | -1.82776666 |
| 58 | 2010107G23Rik | 10 | 0.000177 | 0.046484 | -1.84135025 |
| 59 | Sh2d4a | 8 | 1.43E-05 | 0.011613 | -1.84714625 |
| 60 | Pm20d1 | 1 | 0.000177 | 0.046484 | -1.88756631 |
| 61 | Klhl31 | 9 | 2.81E-05 | 0.020241 | -1.8890941 |
| 62 | Ptgds | 2 | 3.18E-06 | 0.003997 | -1.92632837 |
| 63 | Srrm4 | 5 | 0.000152 | 0.043809 | -1.92644861 |
| 64 | Pln | 10 | 2.57E-05 | 0.019108 | -1.93420311 |
| 65 | Krt222 | 11 | 0.000142 | 0.043809 | -1.94004721 |
| 66 | Art1 | 7 | 2.88E-05 | 0.020241 | -1.95682535 |
| 67 | Yipf7 | 5 | 6.79E-06 | 0.007051 | -1.97377105 |
| 68 | Tuba8 | 6 | 0.000165 | 0.046164 | -1.97773751 |
| 69 | Slc25a34 | 4 | 3.7E-05 | 0.023079 | -1.99457538 |
| 70 | Crhr2 | 6 | 8.03E-05 | 0.033648 | -2.05154728 |
| 71 | Scn4a | 11 | 9.74E-05 | 0.036688 | -2.06290931 |
| 72 | Hrc | 7 | 1.92E-08 | 0.000201 | -2.0862654 |
| 73 | Fndc5 | 4 | 1.29E-06 | 0.002101 | -2.09076165 |
| 74 | Cmya5 | 13 | 4.27E-05 | 0.023708 | -2.10598564 |
| 75 | Fsd2 | 7 | 4.49E-05 | 0.023708 | -2.12431042 |
| 76 | Sypl | 3 | 0.000182 | 0.046799 | -2.18314416 |
| 77 | Thbs4 | 13 | 0.000118 | 0.038906 | -2.19730372 |
| 78 | Car14 | 3 | 3.59E-05 | 0.023079 | -2.20528605 |
| 79 | B3galt2 | 1 | 7.21E-05 | 0.032855 | -2.20837734 |
| 80 | Rnf207 | 4 | 4.69E-05 | 0.023868 | -2.21497743 |
| 81 | 2310050B05Rik | 10 | 3.16E-06 | 0.003997 | -2.23147493 |
| 82 | Myot | 18 | 3.87E-08 | 0.000201 | -2.25052767 |
| 83 | Bdh1 | 16 | 0.000134 | 0.042396 | -2.32996083 |
| 84 | Grip2 | 6 | 2.01E-06 | 0.003074 | -2.36727023 |
| 85 | Gm889 | 12 | 0.000107 | 0.03824 | -2.39239764 |
| 86 | Fmod | 1 | 3.04E-05 | 0.02077 | -2.40082309 |
| 87 | Slc2a4 | 11 | 5.37E-06 | 0.006068 | -2.41681375 |
| 88 | Abcc8 | 7 | 5.75E-05 | 0.027147 | -2.43957832 |
| 89 | Acta1 | 8 | 5.26E-05 | 0.025321 | -2.46561339 |
| 90 | Lrrc4b | 7 | 1.34E-05 | 0.011568 | -2.62789749 |
| 91 | 2210407C18Rik | 11 | 0.000171 | 0.046484 | -2.73112264 |
| 92 | Gck | 11 | 1.78E-07 | 0.000662 | -3.07921286 |
| 93 | Dhrs7c | 11 | 1.07E-05 | 0.009943 | -3.11416848 |
| 94 | Asb10 | 5 | 3.82E-07 | 0.000993 | -3.53772842 |
| 95 | Mylk4 | 13 | 9.12E-07 | 0.001692 | -3.93333046 |
| 96 | Kcnip2 | 19 | 2.92E-08 | 0.000201 | -4.14478078 |
| 97 | Fstl4 | 11 | 1.25E-07 | 0.000543 | -4.4001082 |
| 98 | Lrtm1 | 14 | 7.81E-07 | 0.001562 | -4.95027441 |
| 99 | Fam169a | 13 | 6.37E-06 | 0.00689 | -4.99909173 |
| 100 | Gkn3 | 6 | 5.44E-07 | 0.001178 | -5.86235283 |
| 101 | Scn4 | 9 | 3.19E-07 | 0.00092 | -6.97746025 |
| 102 | Wnt9b | 11 | 2.19E-07 | 0.000712 | -7.07536561 |
| 103 | Efemp1 | 11 | 3.44E-28 | 8.94E-24 | -11.7135908 |

**Supplementary Table 6.** Full list of enriched/depleted pathways from GSEA analysis of bulk RNA-seq data of infarct zone tissue of *Efemp1-/-* and WT mice at day-3 post-MI (data of Supplementary Table 4), ranked by normalised enrichment score (NES) of pathways in *Efemp1-/-* mice relative to WT.

| **Name** | **Normalised Enrichment Score (NES)** | **FWER p-value** |
| --- | --- | --- |
| cytoplasmic ribosomal proteins%wikipathways_20190910%wp163%mus musculus | 3.0064538 | 0 |
| hallmark_tnfa_signaling_via_nfkb%msigdb_c2%hallmark_tnfa_signaling_via_nfkb | 2.8969045 | 0 |
| cytosolic ribosome%gocc%go:0022626 | 2.8716636 | 0 |
| cytosolic small ribosomal subunit%gocc%go:0022627 | 2.7421553 | 0 |
| cytosolic large ribosomal subunit%gocc%go:0022625 | 2.7093391 | 0 |
| peptide chain elongation%reactome%r-hsa-156902.2 | 2.7075503 | 0 |
| eukaryotic translation termination%reactome database id release 70%72764 | 2.6589925 | 0 |
| nonsense mediated decay (nmd) independent of the exon junction complex (ejc)%reactome database id release 70%975956 | 2.6249723 | 0 |
| selenocysteine synthesis%reactome database id release 70%2408557 | 2.6158545 | 0 |
| selenoamino acid metabolism%reactome%r-hsa-2408522.4 | 2.6142175 | 0 |
| viral mrna translation%reactome database id release 70%192823 | 2.5863633 | 0 |
| eukaryotic translation elongation%reactome%r-hsa-156842.2 | 2.581837 | 0 |
| formation of a pool of free 40s subunits%reactome%r-hsa-72689.2 | 2.5777383 | 0 |
| small ribosomal subunit%gocc%go:0015935 | 2.571751 | 0 |
| nonsense mediated decay (nmd) enhanced by the exon junction complex (ejc)%reactome%r-hsa-975957.1 | 2.5657604 | 0 |
| srp-dependent cotranslational protein targeting to membrane%reactome database id release 70%1799339 | 2.5650725 | 0 |
| nonsense-mediated decay (nmd)%reactome%r-hsa-927802.2 | 2.554698 | 0 |
| interleukin-10 signaling%reactome database id release 70%6783783 | 2.5494666 | 0 |
| cap-dependent translation initiation%reactome%r-hsa-72737.2 | 2.5484219 | 0 |
| l13a-mediated translational silencing of ceruloplasmin expression%reactome%r-hsa-156827.3 | 2.5347686 | 0 |
| ribosomal subunit%gocc%go:0044391 | 2.528233 | 0 |
| gtp hydrolysis and joining of the 60s ribosomal subunit%reactome database id release 70%72706 | 2.5266173 | 0 |
| eukaryotic translation initiation%reactome database id release 70%72613 | 2.5207305 | 0 |
| rrna processing in the nucleus and cytosol%reactome%r-hsa-8868773.3 | 2.496606 | 0 |
| structural constituent of ribosome%gomf%go:0003735 | 2.4792202 | 0 |
| influenza viral rna transcription and replication%reactome database id release 70%168273 | 2.479186 | 0 |
| major pathway of rrna processing in the nucleolus and cytosol%reactome database id release 70%6791226 | 2.476893 | 0 |
| hallmark_allograft_rejection%msigdb_c2%hallmark_allograft_rejection | 2.4503694 | 0 |
| ribosomal small subunit biogenesis%gobp%go:0042274 | 2.3938162 | 0 |
| influenza life cycle%reactome%r-hsa-168255.3 | 2.3936865 | 0 |
| rrna processing%reactome%r-hsa-72312.3 | 2.3873622 | 0 |
| cytoplasmic translation%gobp%go:0002181 | 2.341571 | 0 |
| cell chemotaxis%gobp%go:0060326 | 2.3343358 | 0 |
| influenza infection%reactome database id release 70%168254 | 2.314896 | 0 |
| polysomal ribosome%gocc%go:0042788 | 2.3121495 | 0 |
| leukocyte chemotaxis%gobp%go:0030595 | 2.3026788 | 0 |
| ribosomal large subunit biogenesis%gobp%go:0042273 | 2.218056 | 0 |
| myeloid leukocyte migration%gobp%go:0097529 | 2.2131307 | 0 |
| cytokine activity%gomf%go:0005125 | 2.2036593 | 0 |
| antigen processing and presentation of peptide antigen%gobp%go:0048002 | 2.1980789 | 0 |
| ap-1 transcription factor network%pathway interaction database nci-nature curated data%ap-1 transcription factor network | 2.1973357 | 0 |
| rrna metabolic process%gobp%go:0016072 | 2.1967924 | 0 |
| formation of the ternary complex, and subsequently, the 43s complex%reactome%r-hsa-72695.2 | 2.195465 | 0.001 |
| large ribosomal subunit%gocc%go:0015934 | 2.1915112 | 0.001 |
| regulation of expression of slits and robos%reactome%r-hsa-9010553.1 | 2.1866887 | 0.001 |
| mhc protein complex%gocc%go:0042611 | 2.1865885 | 0.001 |
| translation initiation complex formation%reactome%r-hsa-72649.3 | 2.185553 | 0.001 |
| rrna processing%gobp%go:0006364 | 2.176273 | 0.002 |
| activation of the mrna upon binding of the cap-binding complex and eifs, and subsequent binding to 43s%reactome database id release 70%72662 | 2.1704297 | 0.004 |
| interleukin-4 and interleukin-13 signaling%reactome database id release 70%6785807 | 2.1662052 | 0.004 |
| antigen processing and presentation%gobp%go:0019882 | 2.1508958 | 0.006 |
| cytokines and inflammatory response%wikipathways_20190910%wp222%mus musculus | 2.1351032 | 0.011 |
| preribosome%gocc%go:0030684 | 2.1289802 | 0.014 |
| rrna modification in the nucleus and cytosol%reactome database id release 70%6790901 | 2.1229413 | 0.014 |
| ribosomal small subunit assembly%gobp%go:0000028 | 2.1217468 | 0.014 |
| pid_ap1_pathway%msigdb_c2%pid_ap1_pathway | 2.1215506 | 0.014 |
| leukocyte migration%gobp%go:0050900 | 2.1188793 | 0.014 |
| polysome%gocc%go:0005844 | 2.1105597 | 0.017 |
| mrna splicing%reactome database id release 70%72172 | 2.1099062 | 0.017 |
| ribosomal scanning and start codon recognition%reactome%r-hsa-72702.3 | 2.1094303 | 0.017 |
| positive regulation of hemopoiesis%gobp%go:1903708 | 2.1074545 | 0.017 |
| antigen processing and presentation of exogenous peptide antigen%gobp%go:0002478 | 2.1074343 | 0.017 |
| hallmark_inflammatory_response%msigdb_c2%hallmark_inflammatory_response | 2.099924 | 0.02 |
| positive regulation of leukocyte differentiation%gobp%go:1902107 | 2.099528 | 0.02 |
| spliceosomal complex%gocc%go:0005681 | 2.096131 | 0.026 |
| pid_fra_pathway%msigdb_c2%pid_fra_pathway | 2.0961044 | 0.026 |
| il12-mediated signaling events%pathway interaction database nci-nature curated data%il12-mediated signaling events | 2.0955372 | 0.026 |
| antigen processing and presentation of peptide antigen via mhc class ii%gobp%go:0002495 | 2.094126 | 0.026 |
| neutrophil chemotaxis%gobp%go:0030593 | 2.0798929 | 0.035 |
| granulocyte chemotaxis%gobp%go:0071621 | 2.0740495 | 0.04 |
| antimicrobial humoral response%gobp%go:0019730 | 2.0694537 | 0.042 |
| antigen processing and presentation of peptide or polysaccharide antigen via mhc class ii%gobp%go:0002504 | 2.0685253 | 0.044 |
| defense response to bacterium%gobp%go:0042742 | 2.067715 | 0.044 |
| pre-mrna splicing%reactome%r-hsa-72163.2 | 2.0633993 | 0.047 |
| cell-cell contact zone%gocc%go:0044291 | -2.1107602 | 0.045 |
| actin-mediated cell contraction%gobp%go:0070252 | -2.1123347 | 0.043 |
| nad binding%gomf%go:0051287 | -2.1133156 | 0.042 |
| cardiac conduction%gobp%go:0061337 | -2.114521 | 0.04 |
| atp synthesis coupled electron transport%gobp%go:0042773 | -2.1174624 | 0.038 |
| regulation of transporter activity%gobp%go:0032409 | -2.118235 | 0.035 |
| ribonucleotide biosynthetic process%gobp%go:0009260 | -2.1212347 | 0.033 |
| cardiac muscle tissue morphogenesis%gobp%go:0055008 | -2.1226223 | 0.032 |
| tricarboxylic acid cycle%gobp%go:0006099 | -2.1259358 | 0.028 |
| mitochondrial atp synthesis coupled electron transport%gobp%go:0042775 | -2.127881 | 0.026 |
| nucleoside bisphosphate metabolic process%gobp%go:0033865 | -2.1302009 | 0.025 |
| purine ribonucleotide biosynthetic process%gobp%go:0009152 | -2.1305766 | 0.025 |
| regulation of transmembrane transporter activity%gobp%go:0022898 | -2.1317756 | 0.025 |
| actin filament-based movement%gobp%go:0030048 | -2.1340425 | 0.024 |
| monovalent inorganic cation transport%gobp%go:0015672 | -2.1375813 | 0.021 |
| response to activity%gobp%go:0014823 | -2.1405084 | 0.02 |
| fatty acid beta oxidation%wikipathways_20190910%wp1269%mus musculus | -2.1407804 | 0.02 |
| nucleoside monophosphate metabolic process%gobp%go:0009123 | -2.141951 | 0.02 |
| mitochondrial fatty acid beta-oxidation%reactome%r-hsa-77289.5 | -2.1460838 | 0.017 |
| structural constituent of muscle%gomf%go:0008307 | -2.1474595 | 0.017 |
| citrate metabolic process%gobp%go:0006101 | -2.1476412 | 0.017 |
| nucleoside triphosphate metabolic process%gobp%go:0009141 | -2.152134 | 0.015 |
| positive regulation of cation channel activity%gobp%go:2001259 | -2.1560974 | 0.014 |
| ribonucleoside bisphosphate metabolic process%gobp%go:0033875 | -2.1667707 | 0.009 |
| muscle hypertrophy%gobp%go:0014896 | -2.166836 | 0.009 |
| regulation of ion transmembrane transporter activity%gobp%go:0032412 | -2.1688468 | 0.009 |
| positive regulation of transmembrane transport%gobp%go:0034764 | -2.1693652 | 0.008 |
| lipid oxidation%gobp%go:0034440 | -2.1718483 | 0.008 |
| cell-cell signaling involved in cardiac conduction%gobp%go:0086019 | -2.1789901 | 0.006 |
| electron transport chain%wikipathways_20190910%wp295%mus musculus | -2.1851583 | 0.006 |
| ion homeostasis%reactome database id release 70%5578775 | -2.1859317 | 0.006 |
| purine nucleoside bisphosphate metabolic process%gobp%go:0034032 | -2.1868644 | 0.006 |
| hallmark_adipogenesis%msigdb_c2%hallmark_adipogenesis | -2.189056 | 0.006 |
| ribonucleoside triphosphate metabolic process%gobp%go:0009199 | -2.1895318 | 0.006 |
| m band%gocc%go:0031430 | -2.1902695 | 0.006 |
| fatty acid oxidation%gobp%go:0019395 | -2.1916296 | 0.006 |
| regulation of cardiac muscle cell contraction%gobp%go:0086004 | -2.1952913 | 0.006 |
| oxidative phosphorylation%gobp%go:0006119 | -2.1969824 | 0.006 |
| fatty acid beta-oxidation%gobp%go:0006635 | -2.1992114 | 0.006 |
| mitochondrial membrane part%gocc%go:0044455 | -2.199397 | 0.006 |
| striated muscle contraction%reactome%r-hsa-390522.1 | -2.204785 | 0.006 |
| regulation of muscle contraction%gobp%go:0006937 | -2.2052815 | 0.005 |
| ribonucleoside monophosphate metabolic process%gobp%go:0009161 | -2.2074702 | 0.005 |
| cardiac conduction%reactome%r-hsa-5576891.2 | -2.2141383 | 0.004 |
| purine ribonucleoside monophosphate metabolic process%gobp%go:0009167 | -2.2164743 | 0.004 |
| thioester metabolic process%gobp%go:0035383 | -2.222253 | 0.004 |
| regulation of cardiac muscle cell action potential%gobp%go:0098901 | -2.222693 | 0.003 |
| ion channel binding%gomf%go:0044325 | -2.2235177 | 0.003 |
| a band%gocc%go:0031672 | -2.224574 | 0.003 |
| regulation of actin filament-based movement%gobp%go:1903115 | -2.2253802 | 0.003 |
| striated muscle thin filament%gocc%go:0005865 | -2.228663 | 0.002 |
| purine nucleoside triphosphate metabolic process%gobp%go:0009144 | -2.2287037 | 0.002 |
| acyl-coa metabolic process%gobp%go:0006637 | -2.2330487 | 0.001 |
| positive regulation of ion transmembrane transport%gobp%go:0034767 | -2.2335637 | 0.001 |
| oxidoreductase complex%gocc%go:1990204 | -2.234014 | 0.001 |
| regulation of heart rate%gobp%go:0002027 | -2.236217 | 0 |
| positive regulation of cation transmembrane transport%gobp%go:1904064 | -2.2378032 | 0 |
| positive regulation of ion transmembrane transporter activity%gobp%go:0032414 | -2.2416058 | 0 |
| striated muscle hypertrophy%gobp%go:0014897 | -2.242228 | 0 |
| purine ribonucleoside triphosphate metabolic process%gobp%go:0009205 | -2.2429605 | 0 |
| cardiac muscle hypertrophy%gobp%go:0003300 | -2.2436388 | 0 |
| purine nucleoside monophosphate metabolic process%gobp%go:0009126 | -2.2440038 | 0 |
| positive regulation of transporter activity%gobp%go:0032411 | -2.2579944 | 0 |
| cardiocyte differentiation%gobp%go:0035051 | -2.2588487 | 0 |
| intercalated disc%gocc%go:0014704 | -2.259433 | 0 |
| aerobic respiration%gobp%go:0009060 | -2.259468 | 0 |
| citric acid cycle (tca cycle)%reactome%r-hsa-71403.2 | -2.2619166 | 0 |
| hallmark_fatty_acid_metabolism%msigdb_c2%hallmark_fatty_acid_metabolism | -2.2677824 | 0 |
| regulation of blood circulation%gobp%go:1903522 | -2.2688324 | 0 |
| atp metabolic process%gobp%go:0046034 | -2.2695143 | 0 |
| myofilament%gocc%go:0036379 | -2.2783234 | 0 |
| muscle fiber development%gobp%go:0048747 | -2.278475 | 0 |
| respiratory electron transport%reactome database id release 70%611105 | -2.2939274 | 0 |
| regulation of cardiac muscle contraction%gobp%go:0055117 | -2.296253 | 0 |
| respiratory electron transport chain%gobp%go:0022904 | -2.2968402 | 0 |
| t-tubule%gocc%go:0030315 | -2.3000574 | 0 |
| regulation of striated muscle contraction%gobp%go:0006942 | -2.3049545 | 0 |
| muscle contraction%reactome database id release 70%397014 | -2.306137 | 0 |
| respiratory electron transport, atp synthesis by chemiosmotic coupling, and heat production by uncoupling proteins.%reactome%r-hsa-163200.1 | -2.3086336 | 0 |
| cardiac muscle tissue development%gobp%go:0048738 | -2.31471 | 0 |
| electron transport chain%gobp%go:0022900 | -2.3150637 | 0 |
| tca cycle%wikipathways_20190910%wp434%mus musculus | -2.3211567 | 0 |
| muscle contraction%gobp%go:0006936 | -2.3331597 | 0 |
| sarcomere organization%gobp%go:0045214 | -2.33869 | 0 |
| striated muscle contraction%wikipathways_20190910%wp216%mus musculus | -2.3416383 | 0 |
| muscle system process%gobp%go:0003012 | -2.351891 | 0 |
| sarcolemma%gocc%go:0042383 | -2.3573024 | 0 |
| cell communication involved in cardiac conduction%gobp%go:0086065 | -2.3617103 | 0 |
| generation of precursor metabolites and energy%gobp%go:0006091 | -2.3798501 | 0 |
| cellular component assembly involved in morphogenesis%gobp%go:0010927 | -2.391215 | 0 |
| heart process%gobp%go:0003015 | -2.3988144 | 0 |
| cardiac muscle contraction%gobp%go:0060048 | -2.399019 | 0 |
| regulation of heart contraction%gobp%go:0008016 | -2.41405 | 0 |
| striated muscle contraction%gobp%go:0006941 | -2.4167225 | 0 |
| cardiac muscle cell differentiation%gobp%go:0055007 | -2.4219186 | 0 |
| sarcoplasm%gocc%go:0016528 | -2.4227865 | 0 |
| striated muscle cell differentiation%gobp%go:0051146 | -2.4245431 | 0 |
| myofibril assembly%gobp%go:0030239 | -2.4257855 | 0 |
| heart contraction%gobp%go:0060047 | -2.4326525 | 0 |
| cardiac cell development%gobp%go:0055006 | -2.4419627 | 0 |
| cellular respiration%gobp%go:0045333 | -2.4455566 | 0 |
| pyruvate metabolism and citric acid (tca) cycle%reactome database id release 70%71406 | -2.4493217 | 0 |
| cardiac muscle cell development%gobp%go:0055013 | -2.4574206 | 0 |
| actomyosin structure organization%gobp%go:0031032 | -2.4587104 | 0 |
| sarcoplasmic reticulum%gocc%go:0016529 | -2.4692338 | 0 |
| hallmark_myogenesis%msigdb_c2%hallmark_myogenesis | -2.4713929 | 0 |
| muscle cell development%gobp%go:0055001 | -2.472081 | 0 |
| energy derivation by oxidation of organic compounds%gobp%go:0015980 | -2.4812691 | 0 |
| hallmark_oxidative_phosphorylation%msigdb_c2%hallmark_oxidative_phosphorylation | -2.4841175 | 0 |
| striated muscle cell development%gobp%go:0055002 | -2.5667367 | 0 |
| z disc%gocc%go:0030018 | -2.572716 | 0 |
| the citric acid (tca) cycle and respiratory electron transport%reactome%r-hsa-1428517.1 | -2.576848 | 0 |
| contractile fiber part%gocc%go:0044449 | -2.6347687 | 0 |
| contractile fiber%gocc%go:0043292 | -2.644069 | 0 |
| i band%gocc%go:0031674 | -2.6624746 | 0 |
| sarcomere%gocc%go:0030017 | -2.687026 | 0 |
| myofibril%gocc%go:0030016 | -2.6920128 | 0 |

**Supplementary Table 7.** Cytoscape search function was used to pull out and highlight the core genes encompassing pathways of interest which were either enriched/up or depleted/down in *Efemp1-/-* mice relative to WT (from Supplementary Table 5 data). Pathways are listed vertically in the first column, and the top 10 core genes involved in those pathways are listed by rank left to right (horizontally, columns 2-11). Data are separated by enriched/up (presented first) and depleted/down in *Efemp1-/-* mice.

| **Up in Efemp1-/-** | **1** | **2** | **3** | **4** | **5** | **6** | **7** | **8** | **9** | **10** |
| --- | --- | --- | --- | --- | --- | --- | --- | --- | --- | --- |
| AP-1 Transcription Factor Network | FOSB | MMP9 | ATF3 | IL6 | H2-Q10 | JUN | JUNB | FOSL1 | MT2 | FOSL2 |
| ATF2 Transcription Factor Network | ATF3 | IL6 | JUN | PDGFRA | HES1 | JUNB | DUSP5 | SOCS3 | JDP2 | FOS |
| Cellular Response to Cadmium Ion | MMP9 | JUN | MT2 | FOS | GSN | MT1 | EGFR | HSF1 | SUMO1 | HMOX1 |
| Cytokine Activity | CCL3 | IL6 | IL1B | LIF | IL1RN | CXCL1 | CXCL3 | CXCL2 | OSM | INHBA |
| Cytokine Receptor Binding | CCL3 | NGF | IL6 | IL1B | LIF | IL1RN | CXCL1 | CXCL3 | SMAD3 | PGF |
| Cytokine Inflammatory Response | IL6 | IL1B | H2-EB1 | CXCL1 | CXCL3 | IL11 | CSF1 | TNF | CD4 | TGFB1 |
| Hallmark Allograft Rejection | MMP9 | IL6 | IL1B | H2-Q10 | LIF | H2-OA | H2-AA | LTB | NCF4 | INHBA |
| Hallmark Inflammatory Response | HAS2 | TNFAIP6 | IL6 | IL1B | ADM | LIF | KCNJ2 | CSF3R | OSM | SPHK1 |
| IL4 IL13 Signaling | MMP9 | PTGS2 | MMP3 | IL6 | IL1B | LIF | OSM | JUNB | CCL11 | FGF2 |
| IL12 Signaling Mediated by Stat4 | H2-EB1 | JUN | CD80 | CD86 | FOS | CD4 | IL18RAP | TGFB1 | IL2RA |  |
| Lung Fibrosis | CCL3 | MMP9 | IL6 | IL1B | CXCL2 | MT2 | CCL11 | FGF2 | SMAD7 | CCL5 |
| Myeloid Leukocyte Activation | JUN | FCGR2B | PRKCD | LBP | FPR2 | NR4A3 | CCL5 | FCGR4 | TNF | JMJD6 |
| NABA Secreted Factors | CCL3 | S100A8 | S100A9 | NGF | IL6 | IL1B | IGF2 | LIF | IL1RN | CXCL14 |
| Osteopontin Mediated Events | MMP9 | JUN | NFKBIA | FOS | MAP3K14 | GSN | ITGB3 | PLAU | PTK2B |  |
| PID AP-1 Pathway | FOSB | MMP9 | ATF3 | IL6 | H2-Q10 | JUN | JUNB | FOSL1 | MT2 | FOSL2 |
| PID ATF2 Pathway | ATF3 | IL6 | JUN | PDGFRA | HES1 | JUNB | DUSP5 | SOCS3 | JDP2 | FOS |
| PID AVB3 OPN Pathway | MMP9 | JUN | NFKBIA | FOS | MAP3K14 | GSN | ITGB3 | PLAU | PTK2B |  |
| PID FRA Pathway | MMP9 | IL6 | MGP | LIF | JUN | JUNB | FOSL1 | PLAUR | DCN | FOSL2 |
| PID IL12 Stat4 Pathway | H2-EB1 | JUN | CD80 | CD86 | FOS | CD4 | IL18RAP | TGFB1 | IL2RA |  |
| Pos Reg Acute Inflammatory Pathway | PTGS2 | IL6 | IL1B | FFAR2 | CCL5 | TNF | MIF | TNFSF11 | FCGR3 | ALOX5AP |
| Pos Reg Fibroblast Proliferation | JUN | PDGFRA | SPHK1 | TGIF1 | CD74 | FOSL2 | EREG | CDKN1A | DDR2 | FBLN1 |
| Reg Acute Inflammatory Pathway | PTGS2 | IL6 | IL1B | SERPING1 | CFH | CD55 | FFAR2 | FCGR2B | NLRP3 | A2M |
| Reg Cell Killing | H2-Q10 | IGF2 | CXCL1 | CFH | CD55 | H2-Q7 | CLEC2D | PGLYRP1 | ARRB2 | KLRB1B |
| Reg Cysteine type Endopeptidase Apoptosis Signaling | MMP9 | SMAD3 | PLAUR | GSN | BAX | JAK2 | HTRA2 | FAS | TFAP4 |  |
| Reg Fibroblast Proliferation | MMP9 | NUPR1 | PMAIP1 | JUN | PDGFRA | SPHK1 | TGIF1 | CD74 | FOSL2 | EREG |
| Reg Leukocyte Mediated Immunity | IL6 | IL1B | H2-Q10 | IGF2 | CXCL1 | CD55 | FGR | H2-Q7 | CLEC2D | FCGR2B |
| Reg Leukocyte Proliferation | LRRC32 | IL6 | IL1B | ARG2 | IGF2 | H2-AA | H2-AB1 | HES1 | CCDC88B | CD80 |
| Reg Lymphocyte Proliferation | LRRC32 | IL6 | IL1B | ARG2 | IGF2 | H2-AA | H2-AB1 | HES1 | CCDC88B | CD80 |
| Reg Mononuclear Cell Proliferation | LRRC32 | IL6 | IL1B | ARG2 | IGF2 | H2-AA | H2-AB1 | HES1 | CCDC88B | CD80 |
| Spinal Cord Injury | MMP9 | NR4A1 | IL6 | IL1B | ZFP36 | CXCL1 | LTB | CXCL2 | CHST11 | KLK8 |
| Validated Transcriptional Targets of AP-1 Family FRA1 FRA2 | MMP9 | IL6 | MGP | LIF | JUN | JUNB | FOSL1 | PLAUR | DCN | FOSL2 |
|  | | | | | | | | | | |
| **Down in Efemp1-/-** | **1** | **2** | **3** | **4** | **5** | **6** | **7** | **8** | **9** | **10** |
| Pos Reg Cation Ion Transmembrane Transport | KCNIP2 | KCNJ11 | CACNA1C | ABCC8 | TRDN | GBAS | ADRB1 | CHCHD10 | GSTM7 | CACNA2D1 |
| Pos Reg Ion Transmembrane Transport | KCNIP2 | KCNJ11 | CACNA1C | ABCC8 | TRDN | GBAS | ADRB1 | CHCHD10 | GSTM7 | CACNA2D1 |
| Pos Reg Transmembrane Transport | KCNIP2 | KCNJ11 | CACNA1C | ABCC8 | TRDN | GBAS | ERBB4 | ADRB1 | CHCHD10 | GSTM7 |
| Reg Calcium Ion Transmembrane Transport | DHRS7C | CAV3 | CACNA1C | TRDN | GBAS | TMEM38A | ADRB1 | CASQ2 | GSTM7 | CACNA2D1 |
| Reg Cation Channel Activity | AMIGO1 | STOM | GNB5 | KCNE1 | DYSF | HCN1 | NPPA | HOMER1 | PRKG1 | GSG1L |
| Reg Ion Transmembrane Transporter Activity | AHNAK | WNK1 | HECW2 | AMIGO1 | STOM | GNB5 | KCNE1 | DYSF | SCN3B | HSPA2 |
| Reg Release Sequestered Calcium into Cytosol | DHRS7C | TRDN | TMEM38A | CASQ2 | GSTM7 | JPH2 | APLNR | RYR2 | ANK2 | AKAP6 |
| Reg Transmembrane Transporter Activity | AHNAK | WNK1 | HECW2 | AMIGO1 | STOM | GNB5 | KCNE1 | DYSF | SCN3B | HSPA2 |
| Reg Transporter Activity | AHNAK | WNK1 | HECW2 | AMIGO1 | STOM | GNB5 | KCNE1 | DYSF | SCN3B | HSPA2 |

**References**

1 Farbehi, N. *et al.* Single-cell expression profiling reveals dynamic flux of cardiac stromal, vascular and immune cells in health and injury. *Elife* **8**, doi:10.7554/eLife.43882 (2019).

2 Vidal, R. *et al.* Transcriptional heterogeneity of fibroblasts is a hallmark of the aging heart. *JCI insight* **4**, doi:10.1172/jci.insight.131092 (2019).

3 Soliman, H. *et al.* Pathogenic potential of hic1-expressing cardiac stromal progenitors. *Cell Stem Cell* **26**, 205-220 e208, doi:10.1016/j.stem.2019.12.008 (2020).

4 Kim, J. O. *et al.* A novel system-level approach using rna-sequencing data identifies mir-30-5p and mir-142a-5p as key regulators of apoptosis in myocardial infarction. *Sci Rep* **8**, 14638, doi:10.1038/s41598-018-33020-x (2018).

5 Stuart, T. *et al.* Comprehensive integration of single-cell data. *Cell* **177**, 1888-1902 e1821, doi:10.1016/j.cell.2019.05.031 (2019).

6 Dobin, A. *et al.* Star: Ultrafast universal rna-seq aligner. *Bioinformatics* **29**, 15-21, doi:10.1093/bioinformatics/bts635 (2013).

7 Bolger, A. M., Lohse, M. & Usadel, B. Trimmomatic: A flexible trimmer for illumina sequence data. *Bioinformatics* **30**, 2114-2120, doi:10.1093/bioinformatics/btu170 (2014).

8 Love, M. I., Huber, W. & Anders, S. Moderated estimation of fold change and dispersion for rna-seq data with deseq2. *Genome Biol* **15**, 550, doi:10.1186/s13059-014-0550-8 (2014).

9 Thavapalachandran, S. *et al.* Platelet-derived growth factor-ab improves scar mechanics and vascularity after myocardial infarction. *Science translational medicine* **12**, doi:10.1126/scitranslmed.aay2140 (2020).

10 Farbehi, N. *et al.* Single-cell expression profiling reveals dynamic flux of cardiac stromal, vascular and immune cells in health and injury. *eLife* **e43882**, doi:10.7554/eLife.43882 (2019).

11 Gao, X. M., Xu, Q., Kiriazis, H., Dart, A. M. & Du, X. J. Mouse model of post-infarct ventricular rupture: Time course, strain- and gender-dependency, tensile strength, and histopathology. *Cardiovasc Res* **65**, 469-477, doi:10.1016/j.cardiores.2004.10.014 (2005).

12 Cao, J. *et al.* Estrogen induces cardioprotection in male c57bl/6j mice after acute myocardial infarction via decreased activity of matrix metalloproteinase-9 and increased akt-bcl-2 anti-apoptotic signaling. *Int J Mol Med* **28**, 231-237, doi:10.3892/ijmm.2011.681 (2011).

13 Fang, L. *et al.* Differences in inflammation, mmp activation and collagen damage account for gender difference in murine cardiac rupture following myocardial infarction. *J Mol Cell Cardiol* **43**, 535-544, doi:10.1016/j.yjmcc.2007.06.011 (2007).

14 Cavasin, M. A., Tao, Z., Menon, S. & Yang, X. P. Gender differences in cardiac function during early remodeling after acute myocardial infarction in mice. *Life Sci* **75**, 2181-2192, doi:10.1016/j.lfs.2004.04.024 (2004).

15 Farbehi, N. *et al.* Single-cell expression profiling reveals dynamic flux of cardiac stromal, vascular and immune cells in health and injury. *eLife* **8**, e43882, doi:10.7554/eLife.43882 (2019).
